# Supplementary material for: Proper Functions of Peroxisomes Are Vital for Pathogenesis of Citrus Brown Spot Disease Caused by Alternaria alternata
Source: PubMed Central journal article supplement (PMC7712655; doi:10.3390/jof6040248), 2020-10-26
Supplement: jof-06-00248-s001.pdf [file jof-06-00248-s001.pdf]

**Table S1. Oligonucleotide primers used in this study**

| <b>Primer</b> | <b>Sequence (5'→3')</b>                      |
|---------------|----------------------------------------------|
| F0            | GTTCCCAGGTGGATGGTTGCG                        |
| F2-1          | TATCTGATGGCCGGGCTCATG                        |
| qPCR1         | TTAAGCAGCCTGCGACTACC                         |
| qPCR2         | TGGACGTATCGTCGGTTTC                          |
| R2            | TCCTGTGTGAAATTGTTATCCGCTTCTCTTCTTCGTCTGCTCGT |
| F3            | gtcgtgactgggaaaacctggcgCGCAACAACAACCGAAATCG  |
| R3            | AGGCTAACGGACGGATGAAG                         |
| R0            | GAAATGTTCTAGCCGAAAGCAGGG                     |
| hyg3          | GGATGCCTCCGCTCGAAGTA                         |
| Hyg4          | CGTTGCAAGACCTGCCTGAA                         |
| M13R          | GCGGATAACAATTTACACAGGA                       |
| M13F          | GCCAGGGTTTTCCCAGTCACGAC                      |
| Pex6_cp1 3.0  | AATGCGGCCGCCCATCCATCTCTGCTTCTTTCGGA          |
| Pex6_cp2 pst1 | ATCTGCAGTTAAGAGTACAAATCGTCATCCTG             |
